# Supplementary material for: Experimental annotation of the human pathogen Candida albicans coding and noncoding transcribed regions using high-resolution tiling arrays
Source: PubMed Central journal article supplement (PMC2926782; doi:10.1186/gb-2010-11-7-r71), 2010-07-09

**(a)****Replicate 1**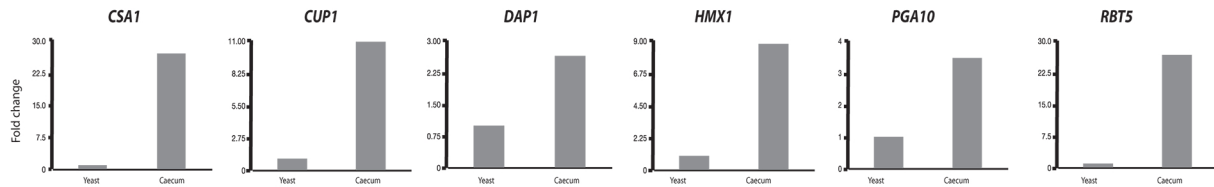**Replicate 2**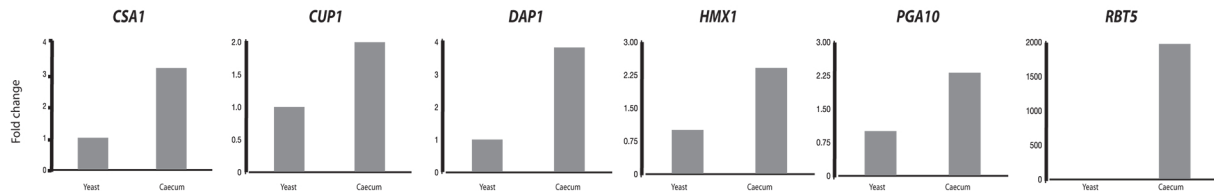**(b)****Replicate 1**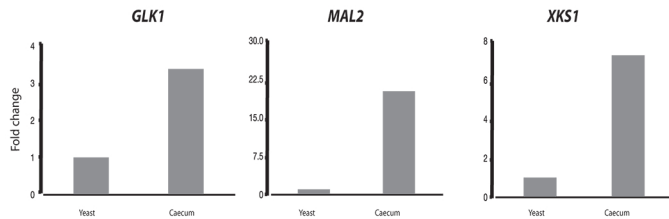**Replicate 2**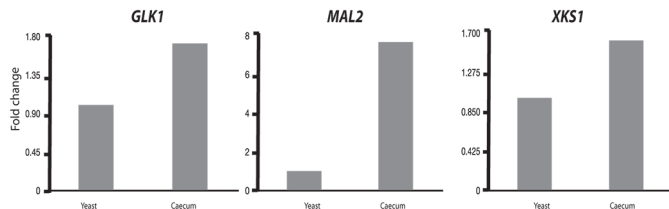

Supplement: gb-2010-11-7-r71-S13.pdf [file gb-2010-11-7-r71-S13.pdf]
